# Supplementary material for: Fabrication of PEDOT:PSS/Ag2Se Nanowires for Polymer-Based Thermoelectric Applications
Source: PubMed Central journal article supplement (PMC7764283; doi:10.3390/polym12122932), 2020-12-08
Supplement: polymers-12-02932-s001.pdf [file polymers-12-02932-s001.pdf]

**Supplementary Information:**

**Fabrication of conductive polymer/inorganic nanoparticles composite  
films: using PEDOT:PSS with Ag<sub>2</sub>Se nanowire for polymer-based  
thermoelectric applications**

Dabin Park, Hyun Ju, Minsu Kim and Jooheon Kim\*

School of Chemical Engineering & Materials Science,

Chung-Ang University, Seoul 06974, Korea

\*Corresponding author: jooheonkim@cau.ac.kr (J. Kim)

Supporting Information Contents:

1. Figures

2. Tables

## 1. Figures

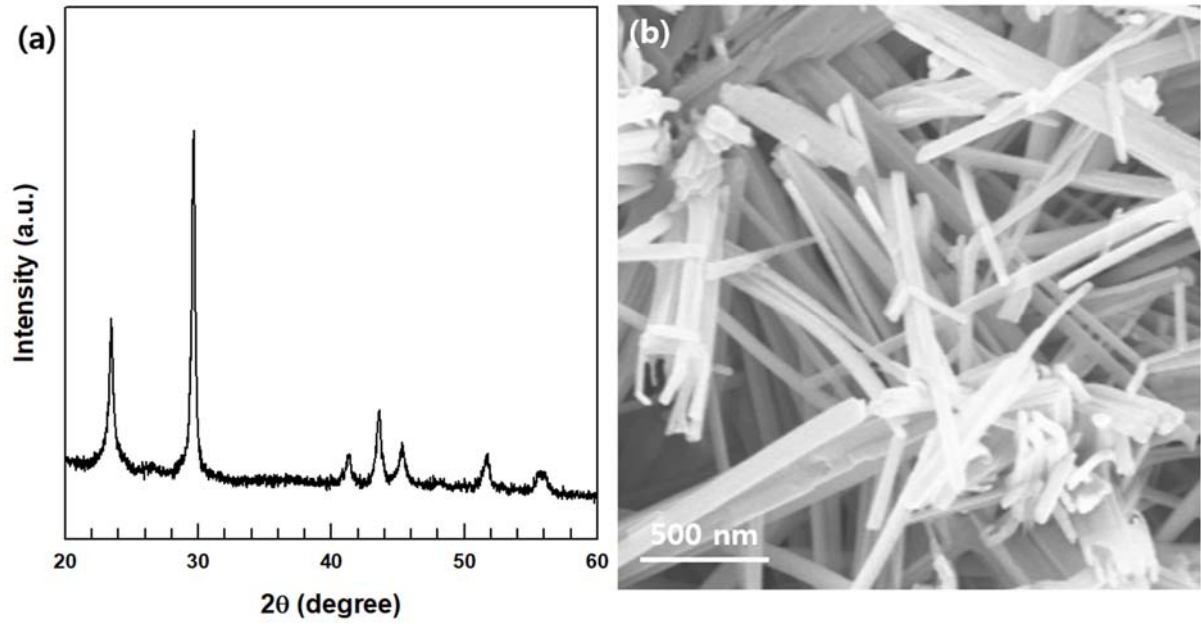

**Figure S1.** (a) XRD pattern and (b) FE-SEM images of synthesized Se NWs

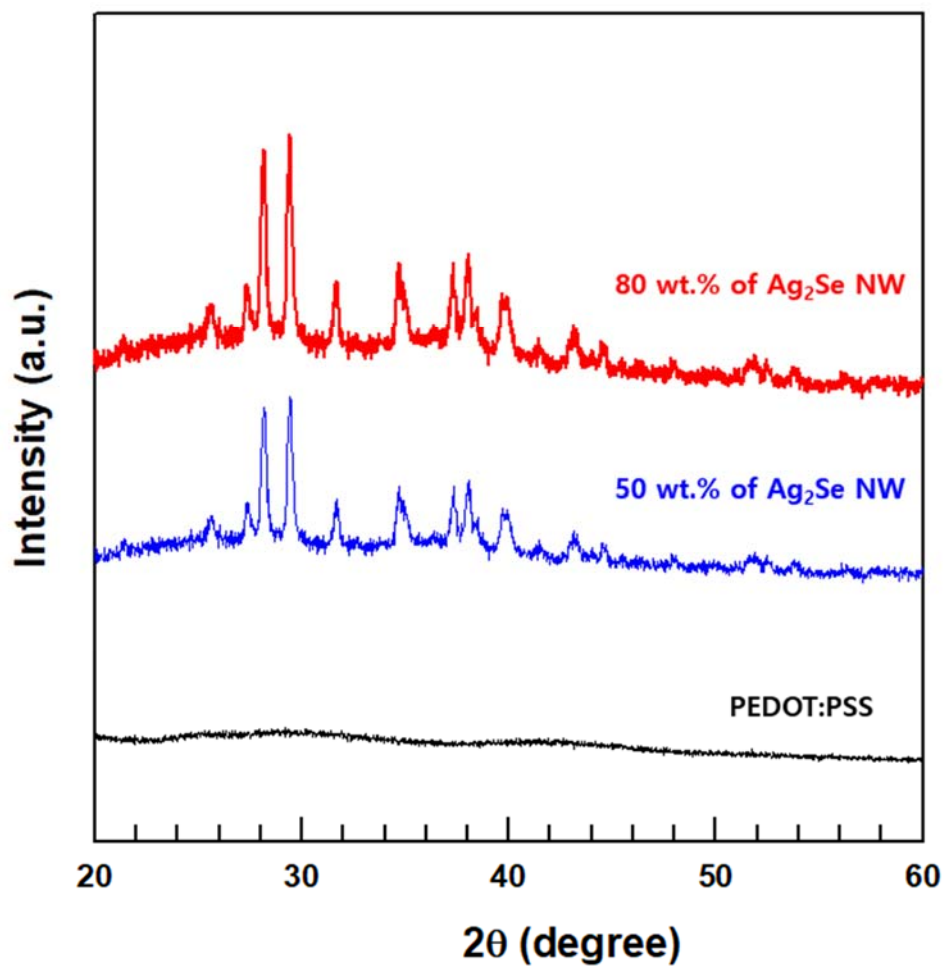

**Figure S2.** XRD pattern and Pristine PEDOT:PSS, Ag<sub>2</sub>Se NW/PEDOT:PSS with 50 and 80 wt.% of Ag<sub>2</sub>Se NWs

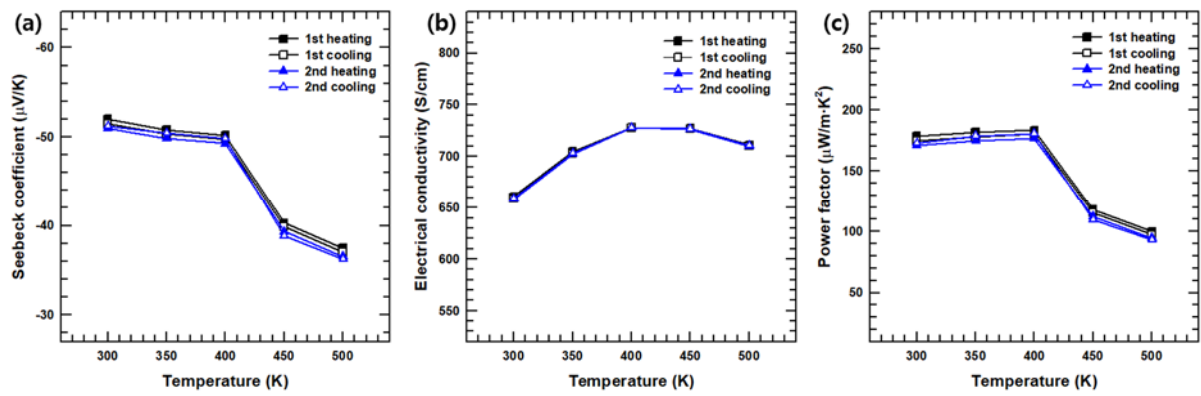

**Figure S3.** Temperature-dependent (a) Seebeck coefficient, (b) electrical conductivity, and (c) power factor values of PEDOT:PSS composite films with 80 wt.% of  $\text{Ag}_2\text{Se}$  during multiple heating and cooling cycles.

## 2. Tables

|                     | $\sigma_s$<br>(S/cm)             | $\sigma_p$<br>(S/cm)            | $S_s$<br>( $\mu\text{V}/\text{K}$ ) | $S_p$<br>( $\mu\text{V}/\text{K}$ ) | $\kappa_s$<br>(W/m $\cdot$ K)    | $\kappa_p$<br>(W/m $\cdot$ K)   |
|---------------------|----------------------------------|---------------------------------|-------------------------------------|-------------------------------------|----------------------------------|---------------------------------|
| In this study       | 581                              | 788.6                           | -145                                | 12.8                                | 0.53                             | 0.22                            |
| Previously reported | $\sim 497$                       | $\sim 700$                      | $\sim -140$                         | $\sim 16$                           | $\sim 0.6$                       | $\sim 0.29$                     |
| References          | Ding <i>et al.</i> <sup>34</sup> | Luo <i>et al.</i> <sup>25</sup> | Ding <i>et al.</i> <sup>34</sup>    | Luo <i>et al.</i> <sup>25</sup>     | Zhao <i>et al.</i> <sup>18</sup> | Kim <i>et al.</i> <sup>24</sup> |

Table S1. Measured electrical conductivity, Seebeck coefficient, and thermal conductivity for

the calculation of the series- and parallel-connected models.
